# Supplementary material for: Low oxygen tension reverses antineoplastic effect of iron chelator deferasirox in human glioblastoma cells
Source: Springer Nature journal article supplement (doi:10.1186/s12885-016-2074-y), 2016-02-01
Supplement: MOESM1 [file 9745934]

## U251

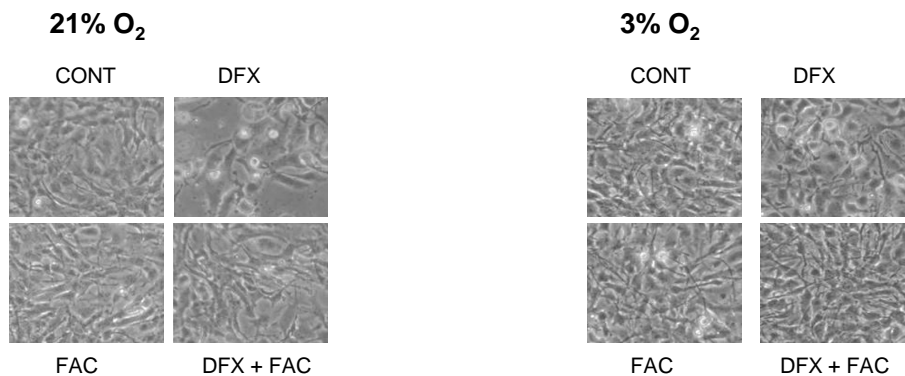

## U87

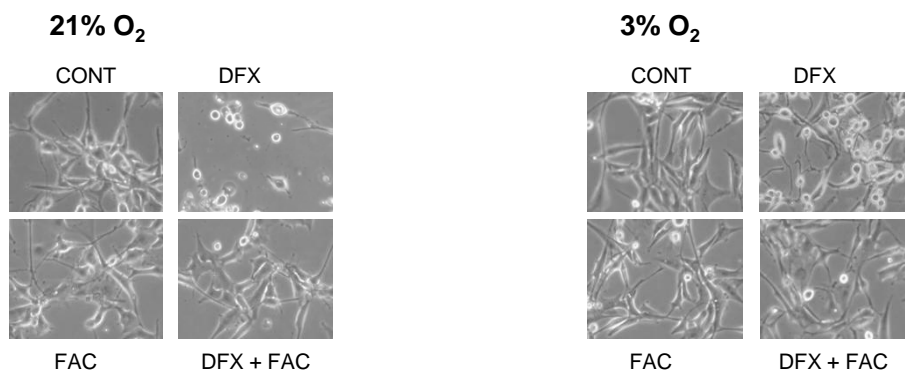

### Figure S1.

Phase-contrast microscopy photography of U251 and U87 glioblastoma cells cultivated at 21% or 3% of oxygen in non-treated condition (CONT) or 3 days after treatment with 5 μM of ferric ammonium citrate (FAC), or with 10 μM of deferasirox and 5 μM of FAC (DFX + FAC) or with 10 μM of deferasirox (DFX) in non-irradiated condition. Original magnification 40 x.
