# Supplementary material for: Low oxygen tension reverses antineoplastic effect of iron chelator deferasirox in human glioblastoma cells
Source: Springer Nature journal article supplement (doi:10.1186/s12885-016-2074-y), 2016-02-01
Supplement: MOESM2 [file 9745934]

## HCT116 cells

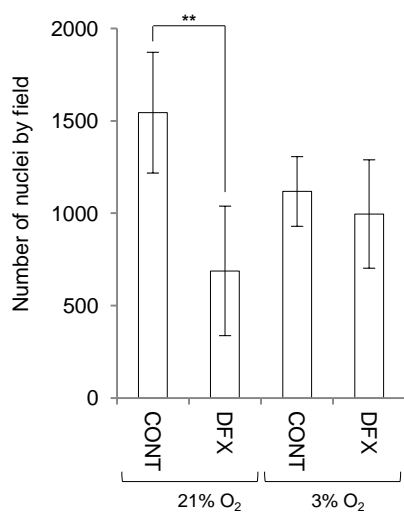

### Figure S2.

Number of nuclei of HCT116 human colon carcinoma cells cultivated at 21% or 3% of oxygen in non-treated condition (CONT) or 3 days after treatment with 10  $\mu$ M of deferasirox (DFX) in non-irradiated condition. The number of nuclei are expressed as mean  $\pm$  standard deviation (S.D.). One-way ANOVA was performed between DFX treatment and CONT in the two conditions of oxygenation (\*\*, p-value  $\leq$  0.01).
