# Supplementary material for: Low oxygen tension reverses antineoplastic effect of iron chelator deferasirox in human glioblastoma cells
Source: Springer Nature journal article supplement (doi:10.1186/s12885-016-2074-y), 2016-02-01
Supplement: MOESM3 [file 9745934]

## U251

21% O<sub>2</sub>

3% O<sub>2</sub>

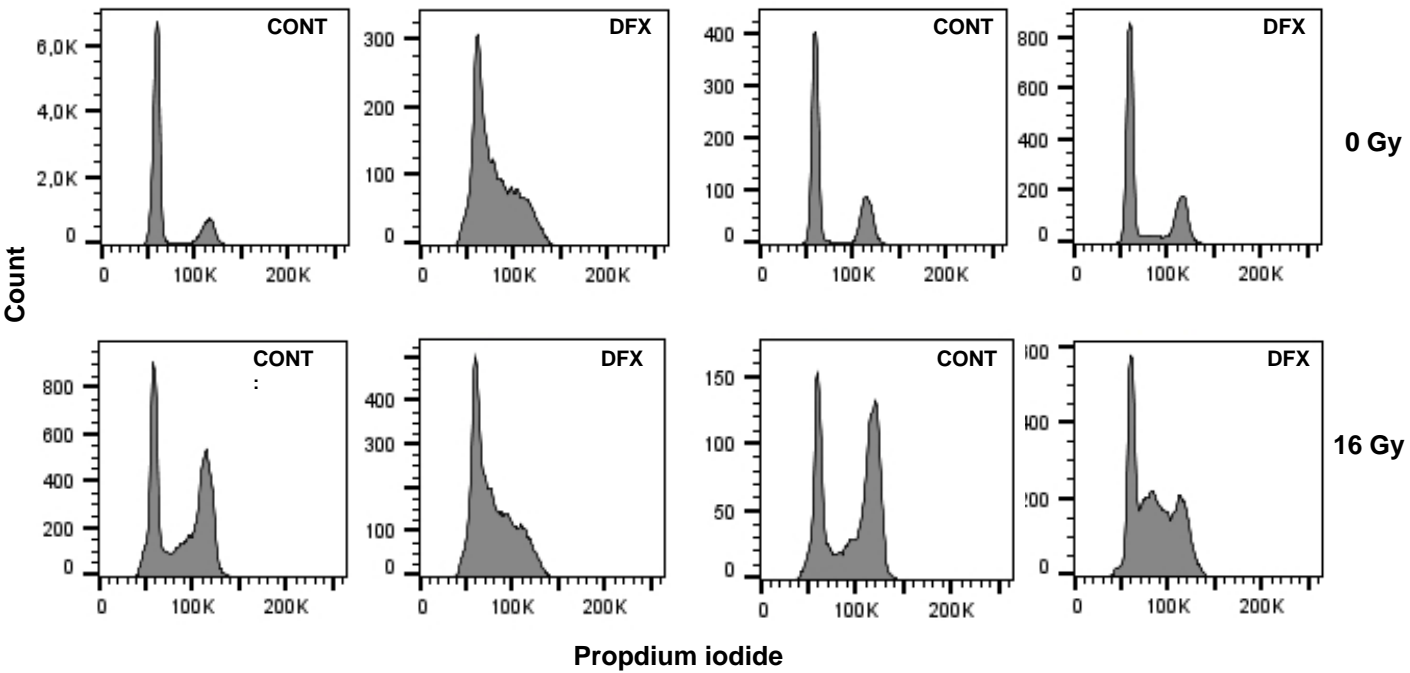

## U87

21% O<sub>2</sub>

3% O<sub>2</sub>

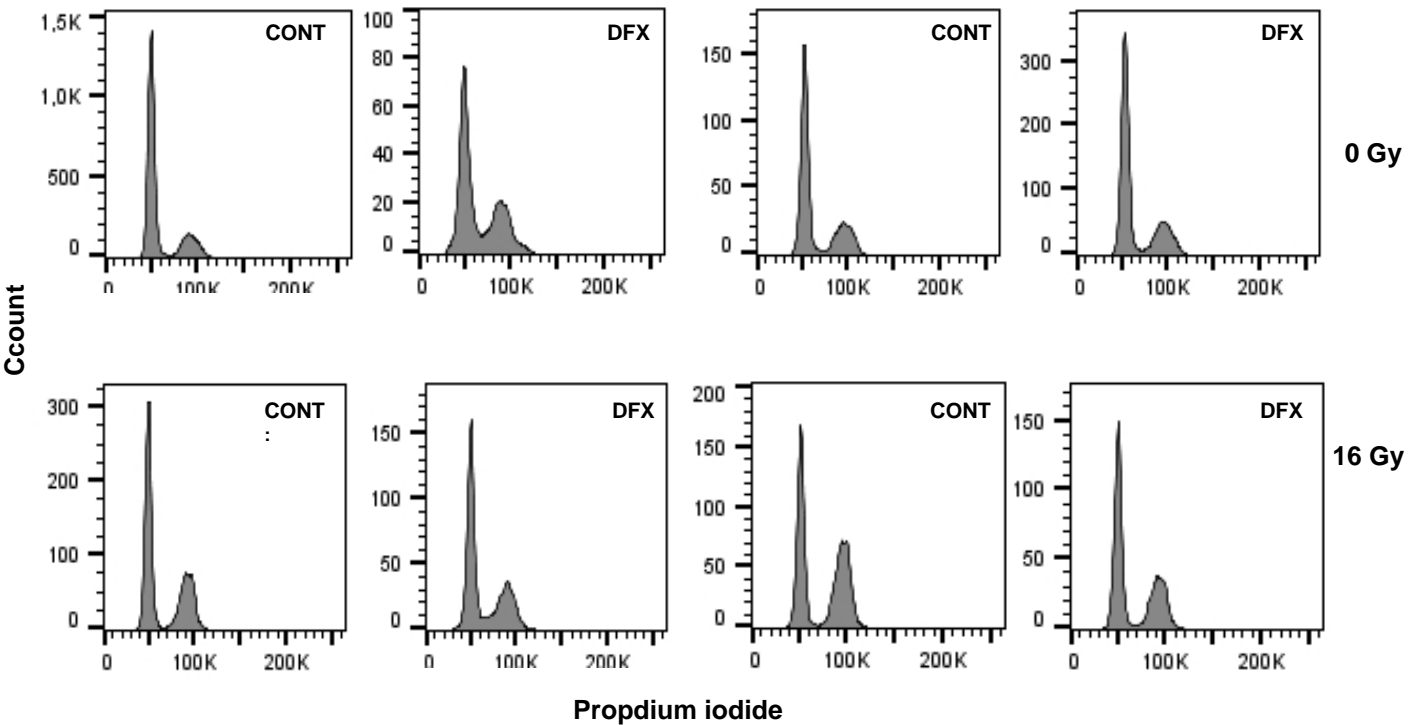

**Figure S3.**

Representative cell cycle profiles for U251 and U87 glioblastoma cells cultivated at 21% or 3% of oxygen in untreated condition (CONT) or 3 days after treatment with 10 μM of deferasirox (DFX) in non-irradiated condition (0 Gy) or following irradiation with 16 grays (16 Gy).
